1 **Title Page**

2  
3 **Simulating and Forecasting the Cumulative Confirmed Cases of SARS-CoV-2 in China by**  
4 **Boltzmann Function-based Regression Analyses**

5  
6 Xinmiao Fu <sup>1,\*</sup>, Qi Ying <sup>2</sup>, Tiejong Zeng <sup>3</sup>, Tao Long <sup>4</sup> and Yan Wang <sup>1</sup>

7  
8  
9 <sup>1</sup> Provincial University Key Laboratory of Cellular Stress Response and Metabolic Regulation, College of Life  
10 Sciences, Fujian Normal University, Fuzhou City, Fujian Province 350117, China

11 <sup>2</sup> Department of Civil and Environmental Engineering, Texas A&M University, College Station, TX 77843,  
12 USA.

13 <sup>3</sup> Department of mathematics, The Chinese University of Hong Kong, Shatin, NT, Hong Kong, China

14 <sup>4</sup> Nanjing Institute of Environmental Sciences, Ministry of Ecology and Environment, China

15  
16 Running title: Forecasting SARS-CoV-2 epidemic by Boltzmann function

17  
18  
19 \* To whom correspondence should be addressed to Professors Xinmiao Fu ([xmfu@fjnu.edu.cn](mailto:xmfu@fjnu.edu.cn);  
20 86-591-22868201)

21  
22 **Keywords:** SARS-CoV-2, 2019-nCoV, Boltzmann function, coronavirus, SARS, epidemic

23

24

## 25 **Summary**

26

27 **Background:** An ongoing outbreak of atypical pneumonia caused by the 2019 novel coronavirus  
28 (SARS-CoV-2) hits Wuhan City (the capital of Hubei Province) and has spread to other  
29 provinces/cities of China and overseas. It very urgent to forecast the spread of the outbreak and  
30 estimate how many infected cases will be finally confirmed. Here, we provide an estimate of the  
31 potential total number of confirmed cases in mainland China, in Hubei Province, in Wuhan City  
32 and in other most affected provinces/cities, respectively. The results may help to contain this  
33 public health emergency.

34

35 **Methods:** We used data of cumulative confirmed cases from Jan 21, 2019, to 14, Feb 2020  
36 released daily by the National Health Commission of China and provincial health commissions.  
37 The Boltzmann function was explored to simulate the cumulative number of confirmed cases of  
38 each province/city and also of mainland China. Using these established functions, we forecasted  
39 the national and provincial trends of confirmed cases in the coming weeks. In addition, data of  
40 the cumulative confirmed cases of 2003 SARS-CoV in China and worldwide were collected from  
41 the WHO official website and analyzed similarly. A Monte Carlo technique was applied to analyze  
42 the uncertainty of estimates on cumulative confirmed cases, and the results were presented using  
43 the resulting mean, median, and 95% confidence interval (CI).

44

45 **Findings:** The data of cumulative confirmed cases infected with SARS-CoV-2 with respect to  
46 each region were all well-fitted to the Boltzmann function ( $R^2$  for all regression analyses being  
47 close to 0.999). The potential total number of confirmed cases in mainland China, Hubei Province,  
48 Wuhan City, and other provinces were estimated as 79467 (95% CI 71348, 96569), 64261 (57993,  
49 76056), 46607 (41245, 58129) and 13906 (12727, 15901), respectively; those for the six most  
50 affected provinces (Guangdong, Zhejiang, Henan, Hunan, Anhui and Jiangxi) were 1410 (1325,  
51 1539), 1265 (1201, 1361), 1369 (1263, 1548), 1136 (1048, 1294), 1110 (1021, 1269) and 1123  
52 (947, 1144), respectively; those for top-4 major cities (Beijing, Shanghai, Guangzhou and  
53 Shenzhen) were 429 (395, 487), 356 (334, 392), 365 (347, 393) and 430 (409, 460), respectively.  
54 Notably, our results suggest that the number of daily new confirmed cases of SARS-CoV-2 in  
55 China (including Hubei Province) will become minimal between Feb 27, 2020, and Mar 13, 2020  
56 with 95% CI. In addition, we found that the data of cumulative confirmed cases of 2003 SARS-  
57 CoV in China and Worldwide were also well fitted to Boltzmann function.

58

59 **Interpretation:** The observations that data of cumulative confirmed cases for both the on-going  
60 SARS-CoV-2 and 2003 SARS-CoV were well fitted with the Boltzmann function strongly  
61 suggest that it is suitable to simulate epidemics caused by these coronaviruses. However, due to  
62 the uncertainty associated with the released data, the obtained potential total number of confirmed  
63 cases and key dates estimated for the SARS-CoV-2 outbreak should not be used directly for  
64 making public health related decisions.

## 65 **Introduction**

66

67 An outbreak of atypical pneumonia caused by the zoonotic 2019 novel coronavirus (SARS-CoV-  
68 2) is on-going in China [1]. As of Feb 12, 2020 (24:00, GMT+8), there have been 59901  
69 confirmed patients and 1368 deaths from SARS-CoV-2 infection, in China, and the most affected  
70 city, Wuhan, and related regions in Hubei province of China have reported 48206 confirmed  
71 patients and 1310 deaths. Cases infected in Wuhan were also detected in other provinces of China  
72 as well as in many foreign countries or regions including Japan, the Republic of Korea, Canada,  
73 USA, and European countries [2-4]. This SARS-CoV-2 outbreak was declared as a public health  
74 emergency of international concern by the World Health Organization (WHO) on Jan 30 [5].

75  
76 Much research progress has been made in dissecting the evolution and origin of SARS-CoV-2,  
77 as well as characterizing its clinical features and epidemics in the past one and half months [6-  
78 18]. These efforts would significantly guide us to control the SARS-CoV-2 epidemic. While the  
79 outbreak is on-going, people raise grave concerns about the future trajectory of the outbreak,  
80 especially given that the working and schooling time has been already dramatically postponed  
81 after the Chinese Lunar New Year holiday was over (scheduled on Jan 31). It is highly demanding  
82 to estimate the potential total number of confirmed cases, both nationally and locally.

83  
84 Here we present Boltzmann function-based regression analyses on the data of confirmed cases of  
85 SARS-CoV-2 in China. Results indicate that the daily reported cumulative number of confirmed  
86 cases of SARS-CoV-2 regarding every defined region in China (including Hubei Province,  
87 Wuhan city, other top-6 most affected provinces and top-4 major cities) could be fitted well with  
88 Boltzmann function. Subsequent forecasting the trend of cumulative confirmed cases in each  
89 region can be made, which may be helpful for governments, organizations and citizens to  
90 optimize their preparedness and response efforts.

## 91 92 **Methods**

### 93 *Sources of data*

94 We collected the daily cumulative number of confirmed cases (from Jan 21, 2020 to Feb 14, 2020)  
95 infected by SARS-CoV-2 from official websites of the National Health Commission of China and  
96 of health commissions of provinces, municipalities and major cities. Overseas data were not  
97 included in our simulation due to the small number of confirmed cases. The cumulative number  
98 of confirmed cases of 2003 SARS in China and worldwide were obtained from the official website  
99 of WHO.

### 100 *Data fitting with Boltzmann function and estimation of critical dates*

101 Data were organized in Microsoft Excel and then incorporated into Microcal Origin software  
102 (note: 2021 Jan 21 was set as day 1 and so on). The Boltzmann function was applied to data  
103 simulation for each set of data regarding different geographic regions (e.g., China, Hubei  
104 Province and so on) and parameters of each function were obtained, with the potential total  
105 number of confirmed cases being directly given by parameter  $A_2$ . Estimation of critical dates was  
106 performed by predicting the cumulative number of confirmed cases in the coming days post Feb  
107 14, 2020, and the key dates were provisionally set when the number of daily new confirmed cases  
108 is lower than 0.1% of the potential total number. The Boltzmann function for simulation is  
109 expressed as follows:

$$110 \quad C(x) = A_2 + \frac{A_1 - A_2}{1 + e^{(x-x_0)/dx}} \quad (1)$$

111 where  $C(x)$  is the cumulative number of confirmed cases at day  $x$ ;  $A_1$ ,  $A_2$ ,  $x_0$ , and  $dx$  are constants.  
112 In particular,  $A_2$  represents the estimated potential total number of confirmed cases of SARS-  
113 CoV-2. Details of derivation of the Boltzmann function for regression analysis are described in  
114 the supporting information file.

### 115 *Estimation of uncertainty in the non-linear regression*

116 A Monte Carlo technique is applied to assess the uncertainty in the estimated total number of  
117 confirmed cases due to the uncertainty in the reported number cases. 1000 non-linear regressions  
118 were performed with the same time series data but each data point in the time series was perturbed  
119 by multiplying with a random scaling factor that represents the relative uncertainty. We assumed  
120 that the relative uncertainty follows a single-sided normal distribution with a mean of 1.0 and a  
121 standard deviation of 10%. This implies that all reported cases are positive but there is a tendency  
122 to miss-reporting some positive cases so that the reported numbers represent a lower limit. The  
123 resulting mean and 95% confidence interval (CI) were presented.

124

## 125 **Results**

### 126 **Data collection and Assessment**

127 In light of daily reported cases of SARS-CoV-2 since Jan 21, 2020, we decided to collect data for  
128 analysis on the cumulative number of confirmed cases (initially from Jan 21 to Feb 10, 2020) in  
129 several typical regions of China, including the center of the outbreak (i.e. Wuhan City and Hubei  
130 Province), other top provinces ranking in the number of cases (i.e., Guangdong, Zhejiang, Henan,  
131 Hunan, Anhui, and Jiang Provinces) and top-4 major cities in China (i.e., Beijing, Shanghai,  
132 Guangzhou, Shenzhen).

133  
134 During data analysis on Feb 13, 2020, the number of new confirmed cases on Feb 12 in Hubei  
135 Province and Wuhan City suddenly increased by 14840 and 13436, respectively, of which 13332  
136 and 12364 are those confirmed by clinical features (note: all the number of confirmed cases  
137 released by Feb 12 were counted according to the result of viral nucleic acid detection rather than  
138 by referring to clinical features). Afterward, new confirmed cases determined by clinical criteria  
139 in Hubei Province on Feb 13 and 4 are still up to 2052 and 1138. In view of these, we arbitrarily  
140 distributed these suddenly added cases to the reported cumulative number of confirmed cases  
141 from Jan 21 to Feb 14 for Hubei Province by a fixed factor (refer to **Table S1**), assuming that  
142 these newly added cases were linearly accumulative in those days. It is the same forth with the  
143 data for Wuhan City.

### 144 **Fitting data on the confirmed cases of SARS-CoV-2 to Boltzmann function and estimating** 145 **the potential total number of confirmed cases**

146 Fitting analyses using Boltzmann function indicate that all sets of data were well fitted with the  
147 function (all  $R^2$  values being close to 0.999; **Figs. 1, 2** and **S1**). Parameter  $A_2$  in the Boltzmann  
148 function directly represents the potential total number of confirmed cases (refer to **equation 1**).  
149 As summarized in **Table 1**, the potential total number of confirmed cases for mainland China,  
150 Hubei Province, Wuhan City, and other provinces were estimated as  $72800 \pm 600$ ,  $59300 \pm 600$ ,  
151  $42100 \pm 700$  and  $12800 \pm 100$ ; respectively (also refer to **Fig. 1**); those for the six mostly influenced  
152 provinces (Guangdong, Zhejiang, Henan, Hunan, Anhui and Jiangxi) were  $1300 \pm 10$ ,  $1170 \pm 10$ ,  
153  $1260 \pm 10$ ,  $1050 \pm 10$ ,  $1020 \pm 10$  and  $940 \pm 10$ , respectively (also refer to **Fig. 2**); those for the top-4  
154 major cities (Beijing, Shanghai, Guangzhou and Shenzhen) were  $394 \pm 4$ ,  $328 \pm 3$ ,  $337 \pm 3$  and  $397 \pm 4$ ,  
155 respectively (also refer to **Fig. S1**).

156  
157 In addition, we estimated the key date, on which the number of daily new confirmed cases is  
158 lower than 0.1% of the potential total number of confirmed cases as defined by us subjectively.  
159 As summarized in **Table 1**, the key dates for mainland China, Hubei Province, Wuhan City and  
160 other provinces are Feb28 or Feb 27. It appears that it will take approximately two weeks for  
161 mainland China to reach this state such that the number of daily new confirmed cases of SARS-  
162 CoV-2 post the critical date is below 70.

### 163 **Estimation of uncertainty in the non-linear regression**

164 The above analyses were performed assuming that the released data on the confirmed cases are  
165 precise. However, there is a tendency to miss-report some positive cases such that the reported  
166 numbers represent a lower limit. One typical example indicating this uncertainty is the sudden  
167 increase of more than 13 000 new confirmed cases in Hubei province on Feb 12 after clinical  
168 features were officially accepted as a standard for infection confirmation. Another uncertainty  
169 might result from insufficient kits for viral nucleic acid detection at the early stage of the outbreak.  
170 We thus examined the effects of the uncertainty of the released data on the estimation of the  
171 potential total number of confirmed cases using a Monte Carlo method (for detail, refer to the  
172 Methods section). For simplicity, we assumed that the relative uncertainty of the reported data  
173 follows a single-sided normal distribution with a mean of 1.0 and a standard deviation of 10%.

174

175 Under the above conditions, the potential total numbers of confirmed cases of SARS-CoV-2 for  
176 different regions were estimated (**Figs. 3, S2 and S3**) and summarized in Table 1. The potential  
177 total numbers for China, Hubei Province, Wuhan City and other provinces were 79467 (95% CI  
178 71348, 96569), 64261 (57993, 76056), 46607 (41245, 58129) and 13906 (12727, 15901),  
179 respectively (also refer to **Fig. 3**); those for the six most affected provinces (Guangdong, Zhejiang,  
180 Henan, Hunan, Anhui and Jiangxi) were 1410 (1325, 1539), 1265 (1201, 1361), 1369 (1263,  
181 1548), 1136 (1048, 1294), 1110 (1021, 1269) and 1123 (947, 1144), respectively (also refer to  
182 **Fig. S2**); those for top-4 major cities (Beijing, Shanghai, Guangzhou and Shenzhen) were 429  
183 (395, 487), 356 (334, 392), 365 (347, 393) and 430 (409, 460), respectively (also refer to **Fig. S3**).  
184

185 Such uncertainty analysis also allowed us to estimate the key dates at 95% CI. As summarized in  
186 **Table 1**, the key dates for mainland China, Hubei Province, Wuhan City, and other provinces  
187 would fall in (2/27, 3/13), (2/27, 3/10), (2/28, 3/12) and (2/28, 3/10), respectively (also refer to  
188 **Fig. 3**); those for the six provinces (Guangdong, Zhejiang, Henan, Hunan, Anhui and Jiangxi)  
189 were within (2/22, 3/04), (2/20, 2/28), (2/24, 3/09), (2/28, 3/11), (2/27, 3/11) and (2/24, 3/08),  
190 respectively (also refer to **Fig. S2**); those for top-4 major cities (Beijing, Shanghai, Guangzhou  
191 and Shenzhen) were within (2/27, 3/10), (2/23, 3/05), (2/21, 3/27) and (2/20, 3/26), respectively  
192 (also refer to **Fig. S3**).

### 193 **Data on the confirmed cases of 2013 SARS-CoV were well fitted to Boltzmann function**

194 The ongoing SARS-CoV-2 outbreak has undoubtedly caused the memories of the SARS-CoV  
195 outbreak in 2003. Prompted by the above observation that the data of the SARS-CoV-2 outbreak  
196 so far were well fitted to Boltzmann function, we thus applied this function to fit the epidemic of  
197 2003 SARS-CoV in China and worldwide. Results in **Fig. 4** show that the cumulative numbers  
198 of confirmed cases of 2003 SARS-CoV both in China and worldwide were fitted well with the  
199 Boltzmann distribution function, with  $R^2$  being 0.999 and 0.998, respectively.  
200

## 201 **Discussion**

202 It is of significance to estimate the spread of the SARS-CoV-2 outbreak originating in Wuhan,  
203 China. In particular, a precise estimation of the potential total number of infected cases and/or  
204 confirmed cases is critical for optimal preparedness and implementation of infection control  
205 practices made by governments nationally and locally. An earlier study published on 17 January  
206 2020 [9] suggested that a total of 1,723 cases of SARS-CoV-2 in Wuhan City (95% CI: 427-  
207 4,471) had onset of symptoms by 12th January 2020, which was calculated based on the  
208 internationally reported cases. Later, Wu et al [10] applied a susceptible-exposed-infectious-  
209 recovered (SEIR) metapopulation model to simulate the epidemics of the SARS-CoV-2 outbreak  
210 across all major cities in China on the basis of the number of cases exported from Wuhan to cities  
211 outside mainland China, and they estimated that 75 815 individuals (95% CI 37 304–130 330)  
212 had been infected in Wuhan as of Jan 25, 2020. A recent study based on the Susceptible-Infected-  
213 Recovered-Dead (SIRD) model revealed that the cumulative number of infected cases will  
214 surpass 68,000 (as a lower bound) and could reach 140,000 (with an upper bound of 290,000) by  
215 February 29 [19]. The results of these modeling studies have provided important guidance for  
216 governments and health agencies to intensify preparedness and response efforts.  
217

218 Here we applied Boltzmann function to analyze the reported confirmed cases in mainland China,  
219 focusing Hubei Province and Wuhan City, the center of the outbreak, as well as those most  
220 affected provinces and economic centers. Strikingly, all data sets were well fitted to Boltzmann  
221 function, strongly indicating the feasibility of Boltzmann function to analyze the epidemics of  
222 SARS-CoV-2. In further support of this, the data of 2003 SARS-CoV in China and worldwide  
223 were also well fitted to the function. These results, in conjunction with that Boltzmann function,  
224 can be inferred from a few assumptions (for detail, refer to the Methods section of the support  
225 information file), suggest that Boltzmann function is suitable for analyzing the epidemics of



226 coronaviruses like SARS-CoV and SARS-CoV-2. Whether it works for other infectious diseases  
227 needs to be further investigated. One advantage of this model is that parameter  $A_2$  directly gives  
228 an estimate of the potential total numbers of confirmed cases.

229  
230 Furthermore, the established Boltzmann functions allow us to forecast the trend of the epidemics  
231 of SARS-CoV-2 in different regions in the coming weeks. The potential total numbers of  
232 confirmed cases in mainland China, in Hubei Province, in Wuhan City (the center of the outbreak)  
233 and in other most affected provinces and top4 major cities, as summarized in **Table 1**, may  
234 provide valuable guidance for governments to contain this outbreak in late stages. Notably, our  
235 results also suggest that the number of daily new confirmed cases will become minimal between  
236 Feb 27 and Mar 13 in mainland China at 95% CI (**Fig. 3A**). This trend, if occur as predicted, may  
237 help citizens in China to release stress and anxiety, as there have been many provinces and/cities  
238 in China that have suspended public transportation systems and even implemented house  
239 quarantines for all urban households [20].

240  
241 Nevertheless, our estimates based on the established Boltzmann functions are not absolutely  
242 guaranteed, mainly because of the uncertainty of the reported data (**Figs. 3, S2 and S3**). We  
243 estimated the potential total numbers (refer to **Table 1**) under the assumption that the relative  
244 uncertainty of the reported data follows a single-sided normal distribution with a mean of 1.0 and  
245 a standard deviation of 10%, and this deviation may be underestimated. If the real uncertainty of  
246 released data by governments is larger than 10%, the potential total numbers of confirmed cases  
247 would accordingly increase, and the key dates will be postponed. In addition, it is noted that daily  
248 new confirmed cases in the past few days in several provinces and cities (e.g., Guangdong  
249 Province and Shenzhen City; refer to **Figs. 2A and S1D**, respectively. ) have increased a little bit  
250 more than predicted by the model, presumably because imported cases and/or cluster infection  
251 are increased due to the recent work recovery in many factories in these regions.

252

## 253 **Acknowledgments**

254 We thank graduate students (Boyan Lv, Zhongyan Li, Zhongyu Chen, Yu Cheng, Mengmeng  
255 Bian, Shuang Zhang, Zuqin Zhang, and Wei Yao; all from Prof. Xinmiao Fu's research group at  
256 Fujian Normal University) for data collection from official websites of National and Health  
257 Commission of China and of provincial health commissions in China. The authors would like to  
258 acknowledge colleagues for helpful comments. This work is support by the National Natural  
259 Science Foundation of China (No. 31972918 and 31770830 to XF).

260

## 261 **Declarations**

### 262 **Ethics approval and consent to participate**

263 Ethical approval or individual consent was not applicable.

### 264 **Availability of data and materials**

265 All data and materials used in this work were publicly available, and also available based on request.

### 266 **Disclaimer**

267 The funding agencies had no role in the design and conduct of the study; collection, management, analysis,  
268 and interpretation of the data; preparation, review, or approval of the manuscript; or decision to submit the  
269 manuscript for publication.

### 270 **Conflict of Interests**

271 The authors declared no competing interests.

### 272 **Authors' Contributions**

- 273 (I) Conception and design: Xinmiao Fu  
274 (II) Derivation of the Boltzmann function: Tieyong Zeng  
275 (III) Data simulation and estimation: Xinmiao Fu  
276 (IV) Uncertainty analyses: Qi Ying  
277 (V) Data collection and organization: Tao Long and Yan Wang  
278 (VI) Manuscript drafting: Xinmiao Fu  
279

## 280 References

- 281 1. Zhu, N., D. Zhang, and W. Wang, A novel coronavirus from patients with pneumonia in China. *N Engl J Med*,  
282 2020.  
283 2. Wang, F.S. and C. Zhang, What to do next to control the 2019-nCoV epidemic? *Lancet*, 2020. 395: p. 391-  
284 392.  
285 3. Phelan, A.L., R. Katz, and L.O. Gostin, The Novel Coronavirus Originating in Wuhan, China: Challenges for  
286 Global Health Governance. *JAMA*, 2020.  
287 4. Wang, C., et al., A novel coronavirus outbreak of global health concern. *Lancet*, 2020.  
288 5. Zarocostas, J., What next for the coronavirus response? *Lancet*, 2020. 395: p. 401.  
289 6. Lu, R., et al., Genomic characterisation and epidemiology of 2019 novel coronavirus: implications for virus  
290 origins and receptor binding. *Lancet*, 2020.  
291 7. Wu, F.e.a., A new coronavirus associated with human respiratory disease in China. *Nature*, 2020.  
292 8. Zhou, P.e.a., A pneumonia outbreak associated with a new coronavirus of probable bat origin. *Nature*, 2020.  
293 9. Imai N, D.I., Cori A, Riley S, Ferguson NM, Estimating the potential total number of novel Coronavirus (2019-  
294 nCoV) cases in Wuhan City, China. Imperial College London, 2020.  
295 10. Wu, J.T., K. Leung, and G.M. Leung, Nowcasting and forecasting the potential domestic and international  
296 spread of the 2019-nCoV outbreak originating in Wuhan, China: a modelling study. *Lancet*, 2020.  
297 11. Zhao, S., et al., The association between domestic train transportation and novel coronavirus (2019-nCoV)  
298 outbreak in China from 2019 to 2020: A data-driven correlational report. *Travel medicine and infectious*  
299 *disease*, 2020: p. 101568-101568.  
300 12. Chan, J.F., et al., A familial cluster of pneumonia associated with the 2019 novel coronavirus indicating  
301 person-to-person transmission: a study of a family cluster. *Lancet*, 2020.  
302 13. Chen, N., et al., Epidemiological and clinical characteristics of 99 cases of 2019 novel coronavirus  
303 pneumonia in Wuhan, China: a descriptive study. *Lancet*, 2020.  
304 14. Guan WJ, e.a., Clinical characteristics of 2019 novel coronavirus infection in China.  
305 <https://doi.org/10.1101/2020.02.06.20020974>, 2020.  
306 15. Huang, C., et al., Clinical features of patients infected with 2019 novel coronavirus in Wuhan, China. *Lancet*,  
307 2020.  
308 16. Li, Q., et al., Early Transmission Dynamics in Wuhan, China, of Novel Coronavirus-Infected Pneumonia. *N.*  
309 *Engl. J. Med.*, 2020: p. 10.1056/NEJMoa2001316.  
310 17. Yang Y, e.a., Epidemiological and clinical features of the 2019 novel coronavirus outbreak in China.  
311 <https://doi.org/10.1101/2020.02.10.20021675>, 2020.  
312 18. Zhao, S., et al., Preliminary estimation of the basic reproduction number of novel coronavirus (2019-nCoV)  
313 in China, from 2019 to 2020: A data-driven analysis in the early phase of the outbreak. *Int J Infect Dis*, 2020.  
314 19. Anastassopoulou, C.e.a., DATA-BASED ANALYSIS, MODELLING AND FORECASTING OF THE NOVEL  
315 CORONAVIRUS (2019-NCOV) OUTBREAK. <https://doi.org/10.1101/2020.02.11.20022186>, 2020.  
316 20. Horton, R., Offline: 2019-nCoV—"A desperate plea". *Lancet*, 2020. 395: p. 400.  
317

318  
319  
320

**Table 1 Regression analysis results of confirmed cases of SARS-CoV-2 in China**

| Regions            | without uncertainty    |                       |       | with uncertainty <sup>a</sup>         |                                |
|--------------------|------------------------|-----------------------|-------|---------------------------------------|--------------------------------|
|                    | potential total number | key date <sup>b</sup> | $R^2$ | potential total number (mean, 95% CI) | key date (95% CI) <sup>b</sup> |
| China              | 72800±600              | 2/28                  | 0.999 | 79467 (71348, 96569)                  | (2/27, 3/13)                   |
| Hubei Province     | 59300±600              | 2/27                  | 0.999 | 64261 (57993, 76056)                  | (2/27, 3/10)                   |
| Wuhan City         | 42100±700              | 2/27                  | 0.999 | 46607 (41245, 58129)                  | (2/28, 3/10)                   |
| Other provinces    | 12800±100              | 2/27                  | 0.999 | 13906 (12727, 15901)                  | (2/28, 3/12)                   |
| Guangdong Province | 1300±10                | ND                    | 0.999 | 1410 (1325, 1539)                     | (2/22, 3/04)                   |
| Zhejiang Province  | 1170±10                | ND                    | 0.997 | 1265 (1201, 1361)                     | (2/20, 2/28)                   |
| Henan Province     | 1260±10                | ND                    | 0.999 | 1369 (1263, 1548)                     | (2/24, 3/09)                   |
| Hunan Province     | 1050±10                | ND                    | 0.999 | 1136 (1048, 1294)                     | (2/28, 3/11)                   |
| Anhui Province     | 1020±10                | ND                    | 0.999 | 1110 (1021, 1269)                     | (2/27, 3/11)                   |
| Jiangxi Province   | 940±10                 | ND                    | 0.998 | 1123 (947, 1144)                      | (2/24, 3/08)                   |
| Beijing City       | 394±4                  | ND                    | 0.999 | 429 (395, 487)                        | (2/27, 3/10)                   |
| Shanghai City      | 328±3                  | ND                    | 0.999 | 356 (334, 392)                        | (2/23, 3/05)                   |
| Guangzhou City     | 337±3                  | ND                    | 0.998 | 365 (347, 393)                        | (2/21, 3/27)                   |
| Shenzhen City      | 397±4                  | ND                    | 0.998 | 430 (409, 460)                        | (2/20, 3/26)                   |

321 <sup>a</sup> The reported cumulative number of confirmed cases may have uncertainty. Assuming the relative uncertainty  
322 follows a single-sided normal distribution with a mean of 1.0 and a standard deviation of 10%, the potential  
323 total number and key dates were estimated at 95% CI. For detail, refer to the Methods section and **Figs. 3, S2**  
324 and **S3**.  
325 <sup>b</sup> Key date is determined when the number of daily new confirmed cases is less than 0.1% of the potential total  
326 number. ND: not determined.  
327



328

329 **Figure legends**

**Figure 1**

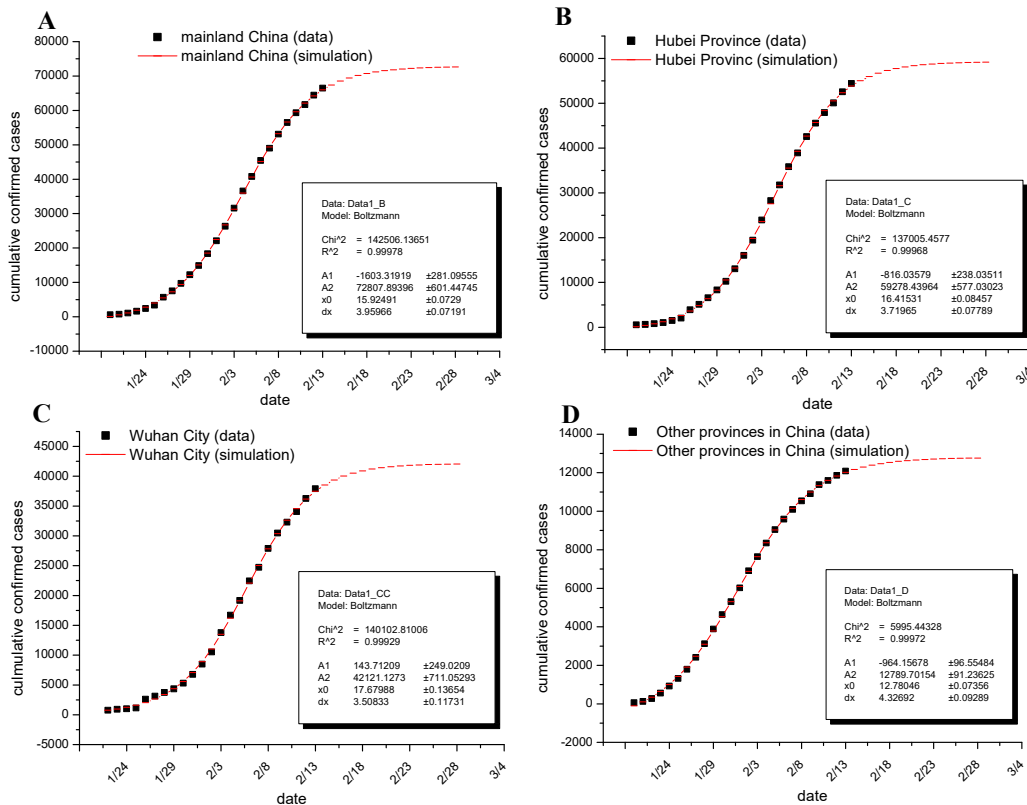

330

331 **Figure 1. Fitting the cumulative number of confirmed cases from mainland China to**  
 332 **Boltzmann function**

333 Cumulative number of confirmed cases of SARS-CoV-2 as of Feb 14, 2020, in mainland China (panel A),  
 334 in Hubei Province (panel B), in Wuhan City (panel C) and in other provinces (panel D) are shown as black  
 335 squares, and the simulation results from Boltzmann function are plotted as red short lines and parameters  
 336 of each established function are shown in inserts. Note: the reported cumulative number of confirmed  
 337 cases of Hubei Province and Wuhan City were re-adjusted for data fitting due to the suddenly added cases  
 338 determined by clinical features (for detail, refer to the Results section and **Table S1**).

339

340

**Figure 2**

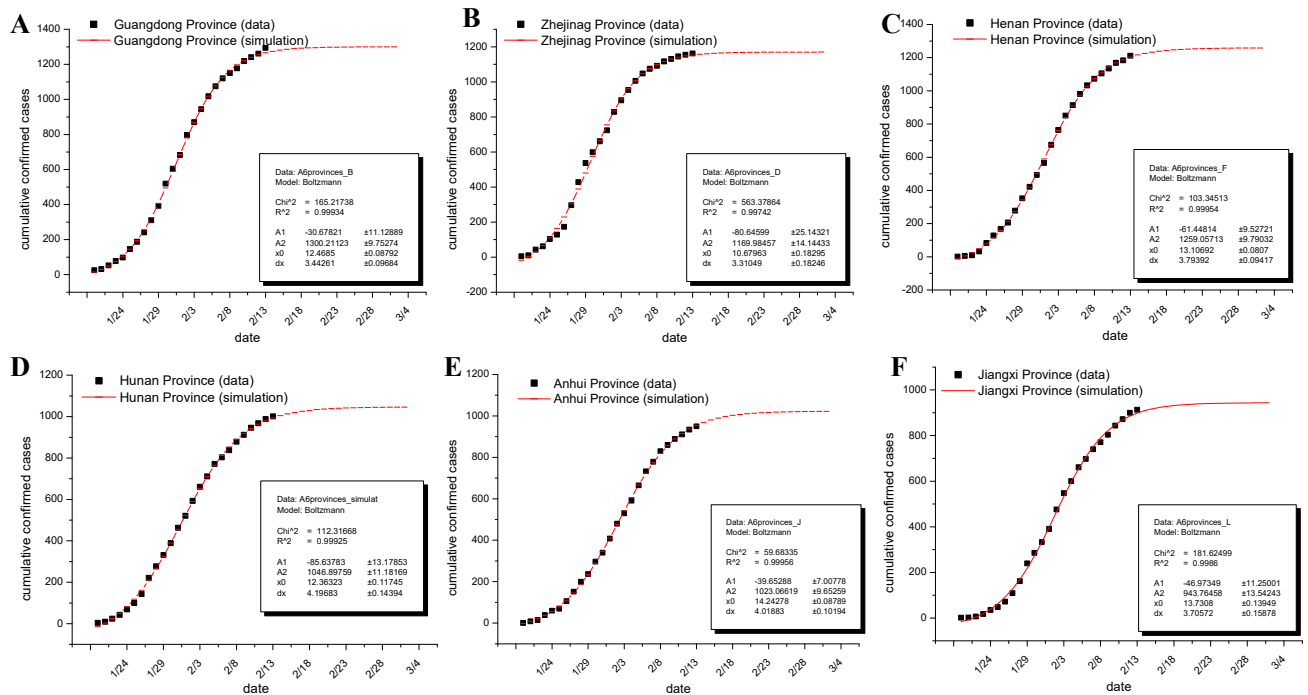

341

342 **Figure 2. Fitting the cumulative number of confirmed cases from the six most affected**  
 343 **provinces to Boltzmann function**

344 Cumulative number of confirmed cases of SARS-CoV-2 as of Feb 14, 2020, in provinces Guangdong  
 345 (panel A), in Zhejiang (panel B), in Henan (panel C), in Hunan (panel D), in Anhui (panel E) and in Jiangxi  
 346 (panel F) are shown as black squares, and the simulation results from Boltzmann function are plotted as  
 347 red short lines and parameters of each established function are shown in inserts.

348

Figure 3

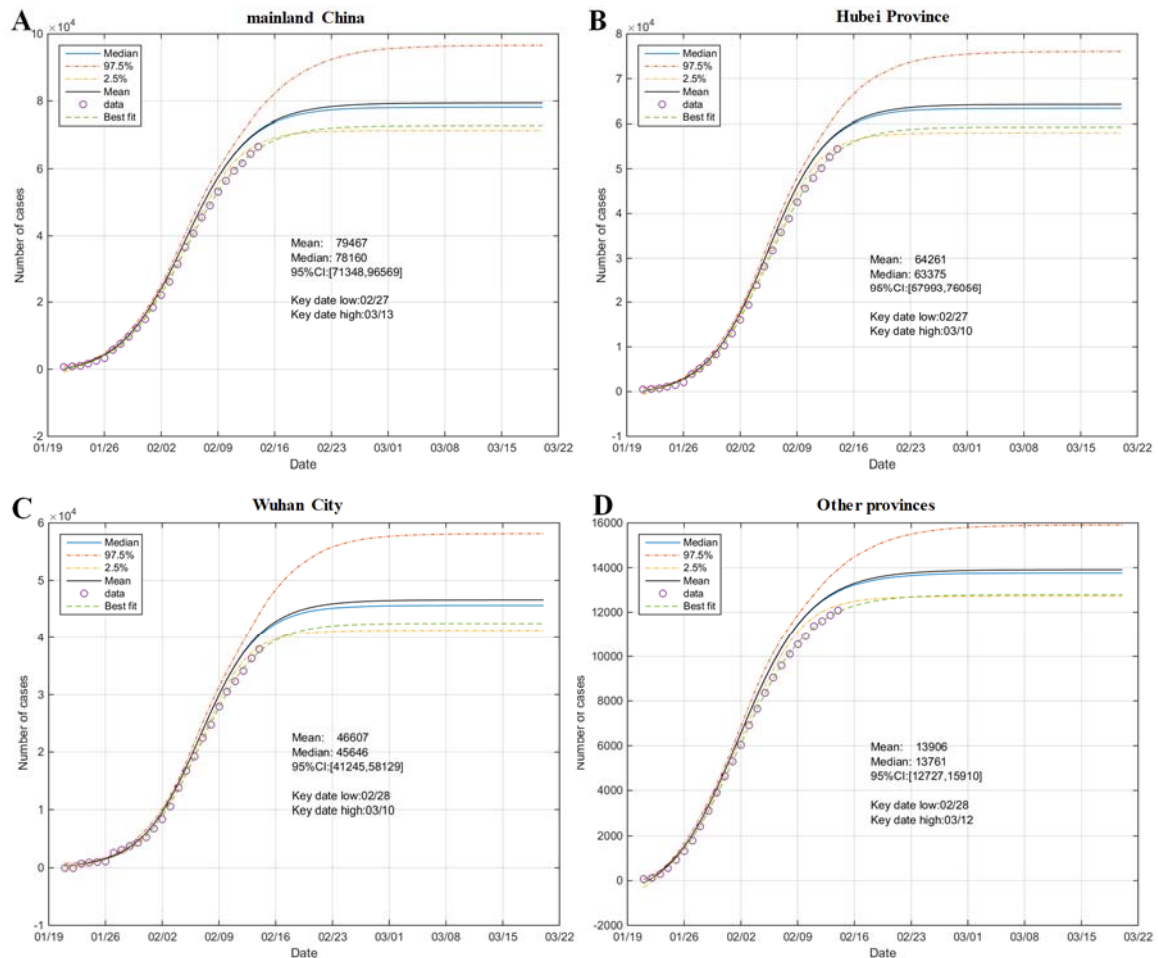

349  
 350 **Figure 3. Analysis of the uncertainty of confirmed cases for mainland China, Hubei, other**  
 351 **provinces and Wuhan**

352 Data of mainland China (panel A), of Hubei Province (panel B), of Wuhan City (panel C) and of  
 353 other provinces (panel D) were fitted to Boltzmann function assuming that the relative uncertainty  
 354 of the data follows a single-sided normal distribution with a mean of 1.0 and a standard deviation  
 355 of 10%. Original data are shown as circles; simulated results are presented as colored lines as  
 356 indicated. Inserts show key statistics. The key date is defined as the date when the number of daily  
 357 new confirmed cases is less than 0.1% of the potential total number. The low and high key dates  
 358 were determined by the simulated curve of confidence interval (CI) at 2.5% and 97.5%,  
 359 respectively.  
 360

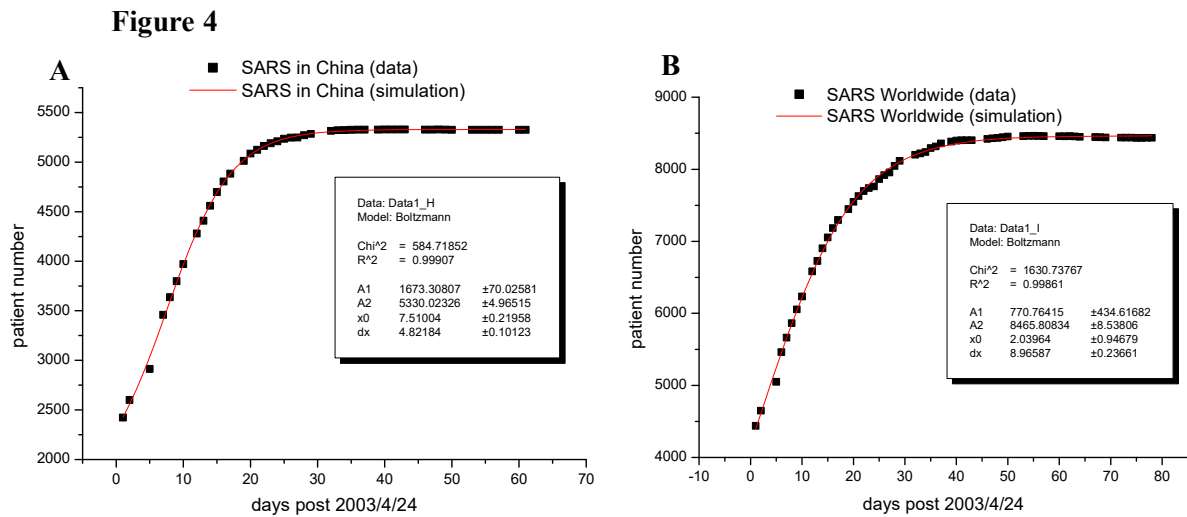

361  
 362 **Figure 4. Fitting the cumulative number of confirmed cases for 2003 SARS in China and**  
 363 **worldwide to Boltzmann function**  
 364 The cumulative number of confirmed cases of 2003 SARS in China (panel A) and worldwide (panel B)  
 365 are shown as black squares, and the simulation results from Boltzmann function are plotted as red short  
 366 lines and parameters of each established function are shown in inserts.  
 367  
 368
